# Supplementary figures and images for: Feasibility of Enzymatic Protein Extraction from a Dehydrated Fish Biomass Obtained from Unsorted Canned Yellowfin Tuna Side Streams: Part II
Source: MDPI journal article supplement (doi:10.3390/gels10040246), 2024-04-03

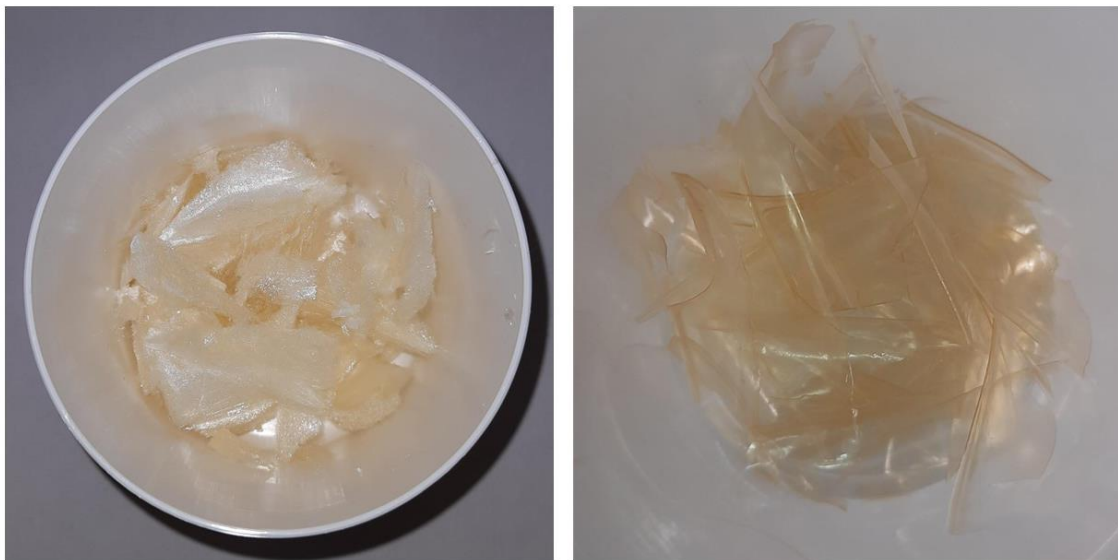

**Figure S1.** Freeze-dried Gelatin and Oven-dried Gelatin.

Supplement: s1 [file s1]
